# Supplementary figures and images for: Sociodemographic, biological, and timing characteristics of dental caries and fluorosis using mixed-type cluster analysis on 12-year-olds in Ho Chi Minh city, 1989–2019
Source: PubMed Central journal article supplement — Heliyon. 2024 Jan 20;10(2):e25035. doi: 10.1016/j.heliyon.2024.e25035 (PMC10835371; doi:10.1016/j.heliyon.2024.e25035), 2024-01-20

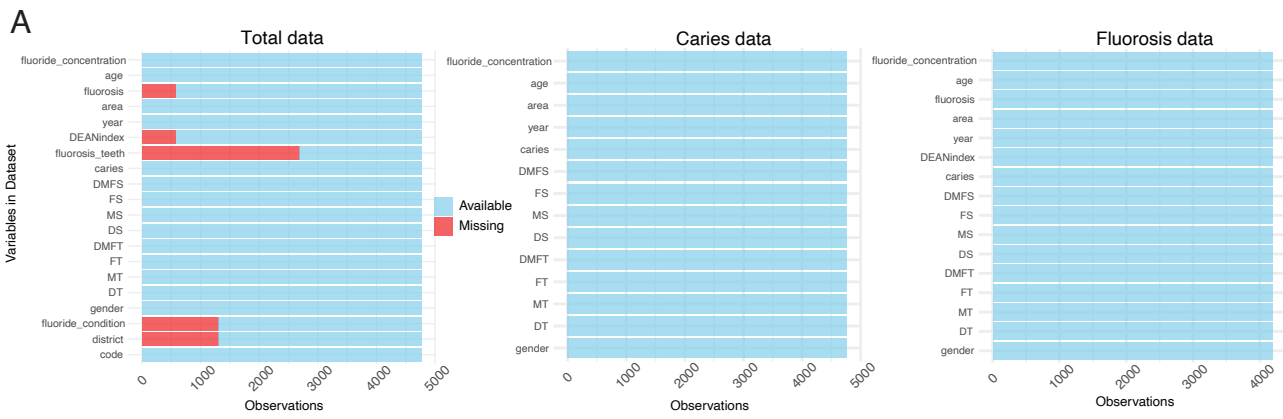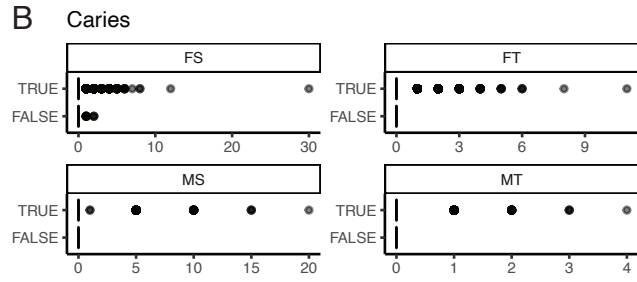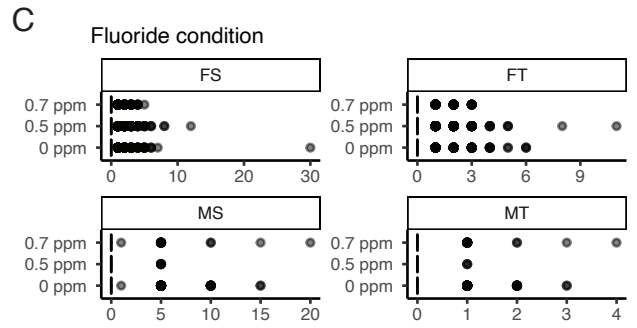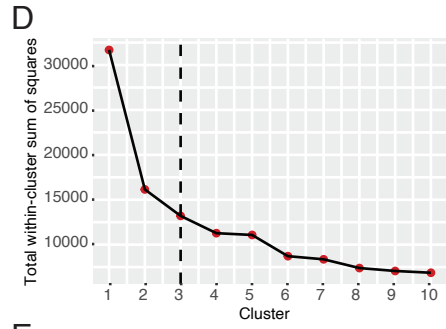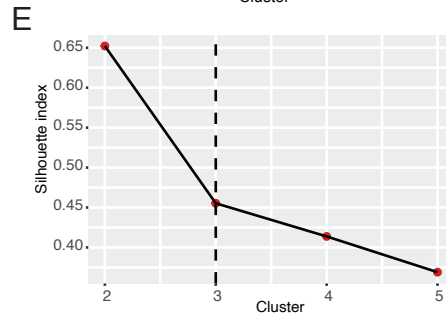

Fig.S1

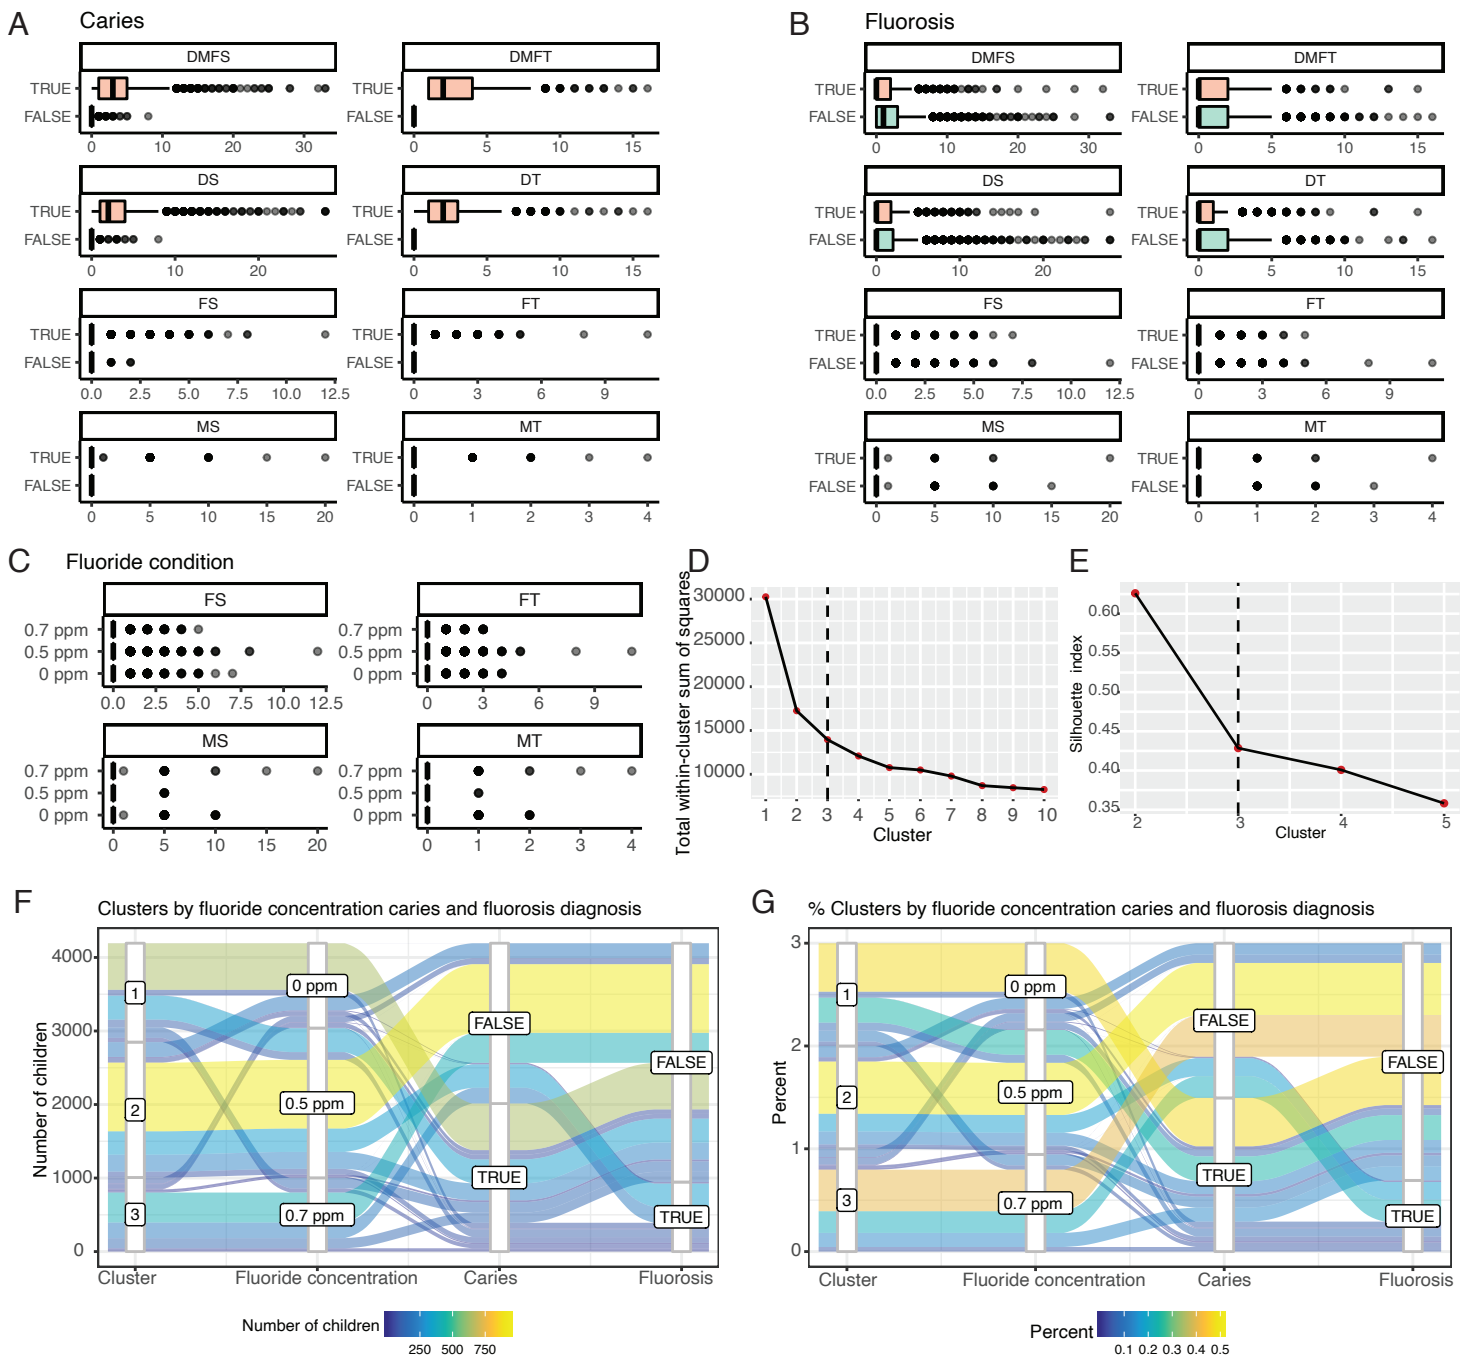

Fig.S2

Supplement: mmc3.pdf [file mmc3.pdf]
